# Supplementary material for: Curcumin inhibits prostate cancer progression by regulating the miR-30a-5p/PCLAF axis
Source: PubMed Central journal article supplement — Exp Ther Med. 2021 Jul 7;22(3):969. doi: 10.3892/etm.2021.10401 (PMC8290411; doi:10.3892/etm.2021.10401), 2021-07-07

Figure S1. Representative images of flow cytometry, BrdU, wound healing and Transwell assays (magnification, x400). PI, propidium iodide.

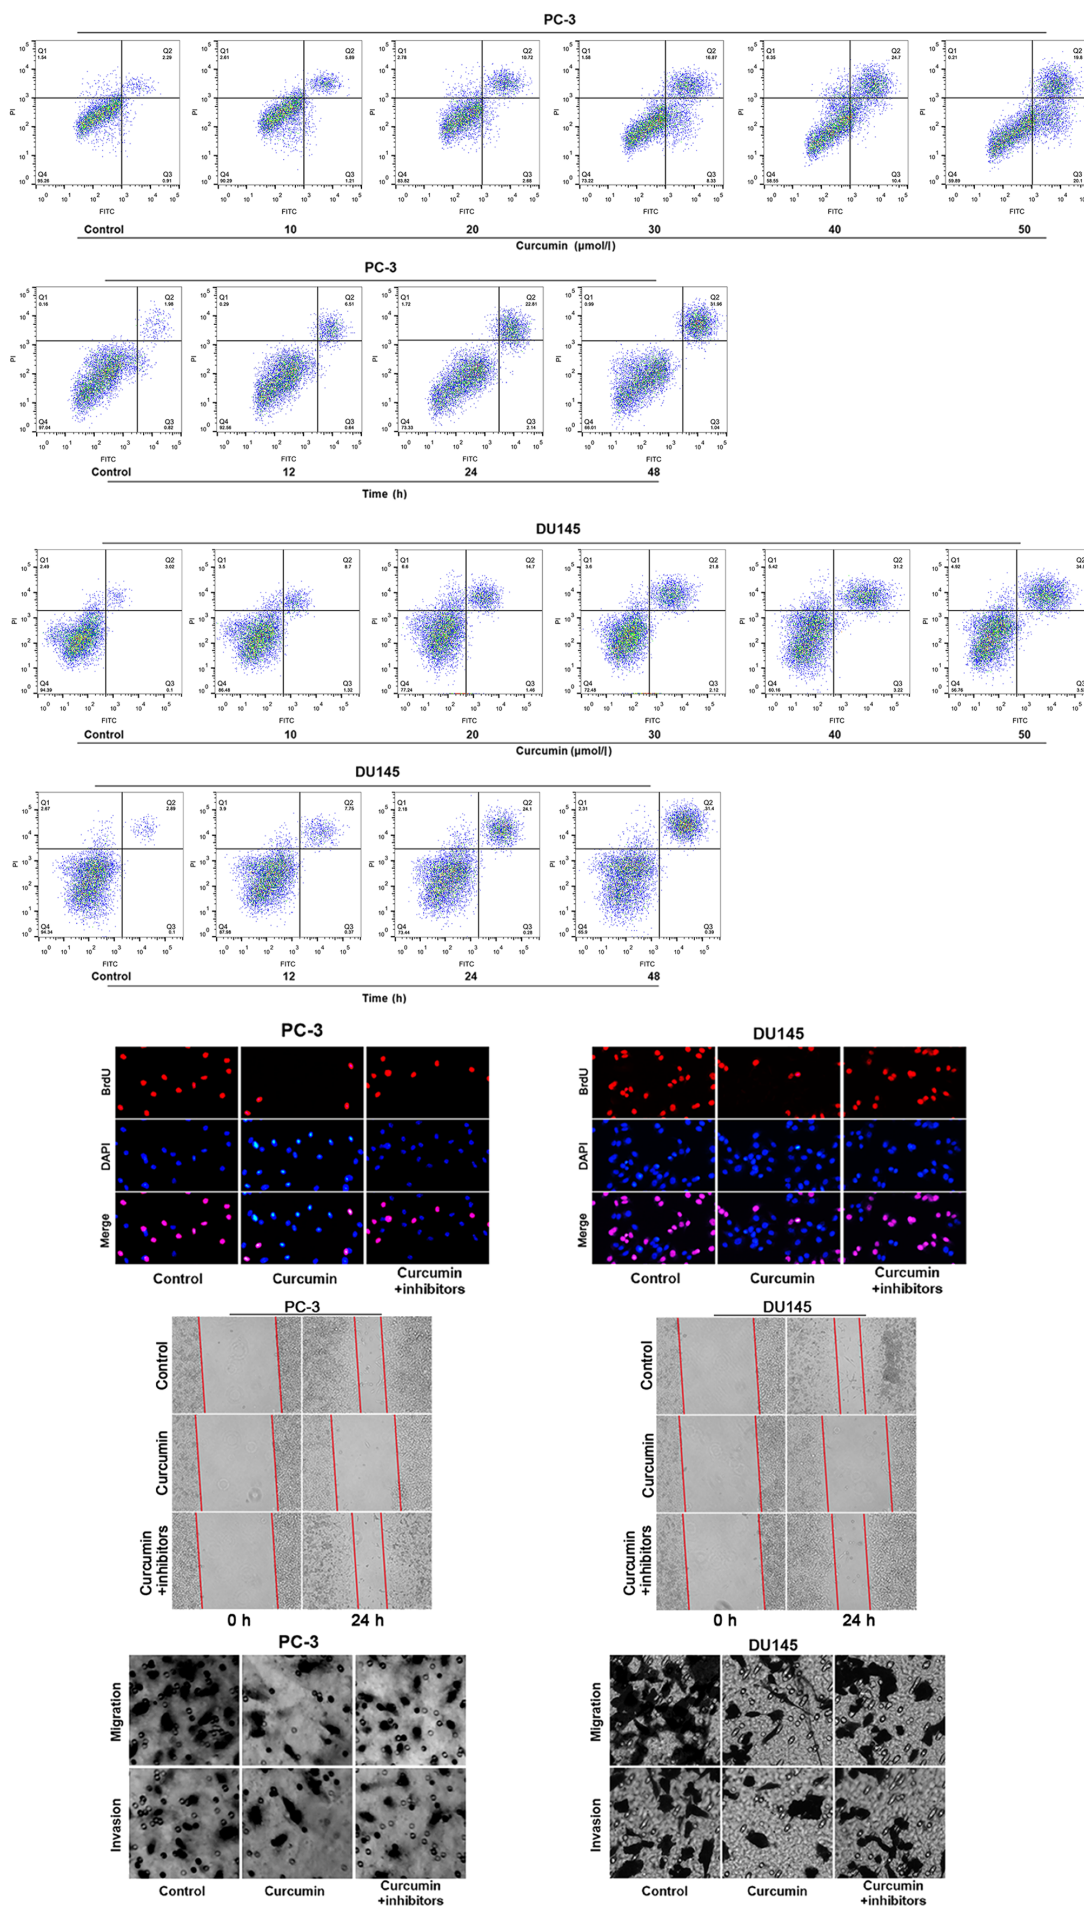

Figure S2. Transfection of miR inhibitors. Expression levels of (A) miR-30a-5p and (B) PCLAF mRNA in PCa tissues and adjacent prostate tissues were detected via RT-qPCR. (C) RT-qPCR was used to detect the transfection efficacy of miR-30a-5p inhibitors. \*\*\* $P < 0.001$  vs. Control or as indicated. PCa, prostate cancer; miR, microRNA; PCLAF, PCNA clamp associated factor; RT-qPCR, reverse transcription-quantitative PCR.

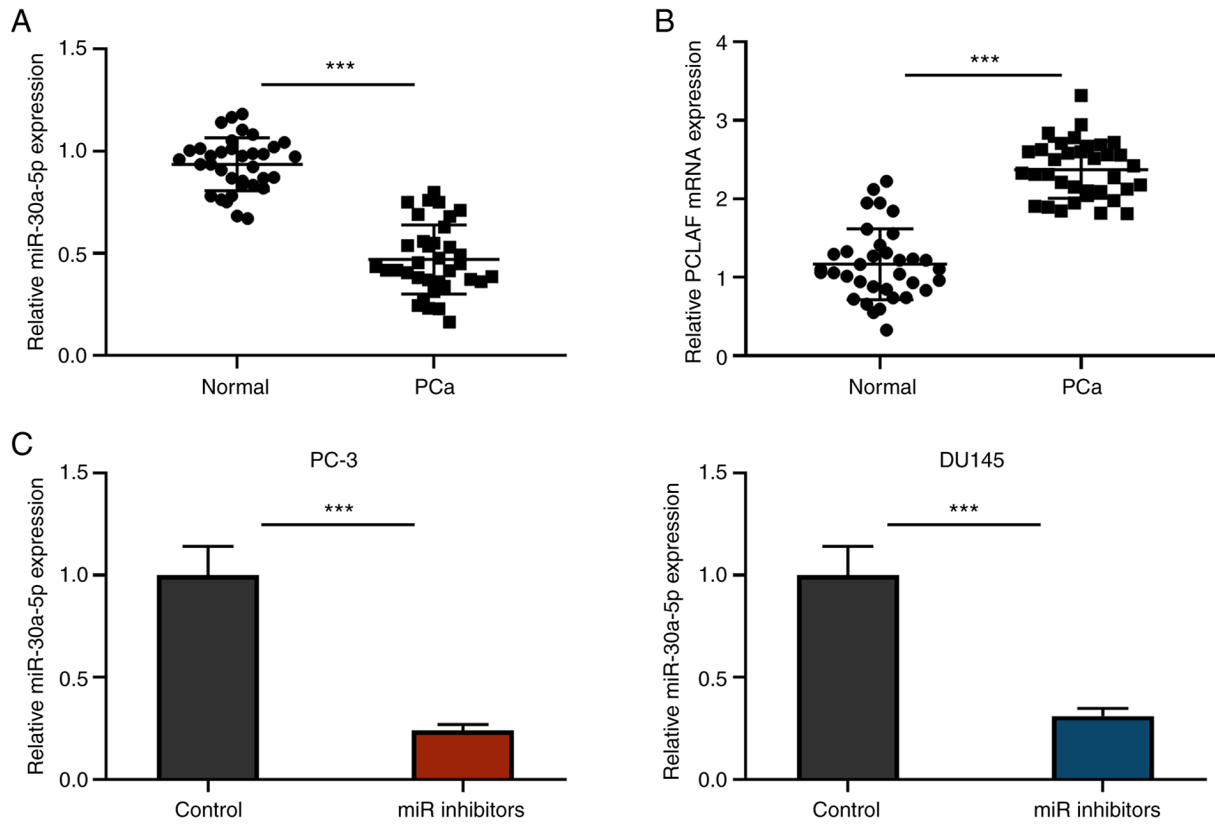

Supplement: Supplementary_Data.pdf [file Supplementary_Data.pdf]
